# Supplementary material for: Antimicrobial Potential of Food Lactic Acid Bacteria: Bioactive Peptide Decrypting from Caseins and Bacteriocin Production
Source: PubMed Central journal article supplement (PMC7824078; doi:10.3390/microorganisms9010065), 2020-12-29
Supplement: microorganisms-09-00065-s001.pdf [file microorganisms-09-00065-s001.pdf]

Table S1. List of peptides identified by MS analysis.

| Amino acid sequence | UniProt Entry | Starting position | Ending position | L. lactis MG1363 | L. rhamnosus 17D10 | L. helveticus 4D5 |
|---------------------|---------------|-------------------|-----------------|------------------|--------------------|-------------------|
| EKVN                | P02662        | 48                | 53              | X                |                    |                   |
| EKVNEL              | P02662        | 50                | 55              | X                |                    |                   |
| ELSKDIG             | P02662        | 54                | 60              | X                |                    |                   |
| SISSEEIVPNSV        | P02662        | 79                | 91              | X                |                    |                   |
| VPSERYLGIV          | P02662        | 101               | 109             | X                |                    |                   |
| YLGYLE              | P02662        | 106               | 111             | X                |                    | X                 |
| YLEQLRLKK           | P02662        | 109               | 118             | X                |                    | X                 |
| LEQLRLKKY           | P02662        | 110               | 119             | X                |                    | X                 |
| IVPNSAEERL          | P02662        | 126               | 135             | X                |                    |                   |
| GIHAQQKEPMIG        | P02662        | 141               | 152             | X                |                    |                   |
| INPSKE              | P02663        | 43                | 48              | X                |                    |                   |
| PSKENL              | P02663        | 45                | 50              | X                |                    |                   |
| FCKEVVRNANE         | P02663        | 54                | 64              | X                |                    | X                 |
| EVVRNA              | P02663        | 57                | 62              | X                |                    |                   |
| VKITVD              | P02663        | 84                | 89              | X                |                    |                   |
| KALNEI              | P02663        | 95                | 100             | X                |                    |                   |
| VLNPWDQVK           | P02663        | 120               | 128             | X                |                    |                   |
| KRNAVPITPTL         | P02663        | 128               | 138             | X                |                    |                   |
| LKTVYQHQA           | P02663        | 195               | 204             | X                |                    |                   |
| KAMKPWIQP           | P02663        | 203               | 211             | X                |                    |                   |
| AMKPWIQPK           | P02663        | 204               | 212             | X                |                    |                   |
| PWIQPKTKVI          | P02663        | 207               | 216             | X                |                    |                   |
| WIQPKTKVIP          | P02663        | 208               | 217             | X                |                    |                   |
| EELNVP              | P02666        | 19                | 25              | X                |                    | X                 |
| ELNVPGE             | P02666        | 20                | 26              | X                |                    | X                 |
| SLSSSEESITRI        | P02666        | 30                | 41              | X                |                    |                   |
| RINKKIEKFQ          | P02666        | 40                | 49              | X                |                    |                   |
| HPFAQTQSLV          | P02666        | 65                | 74              | X                |                    |                   |
| PTVMFPPQSVL         | P02666        | 168               | 178             | X                |                    |                   |
| KAVPYP              | P02666        | 191               | 196             | X                |                    |                   |
| LLYQEPVLPVR         | P02666        | 206               | 217             | X                |                    |                   |
| KDERFFSDK           | P02668        | 34                | 42              | X                |                    |                   |
| RSPAQILQW           | P02668        | 89                | 97              | X                |                    |                   |
| AQILQWQVL           | P02668        | 92                | 100             | X                |                    |                   |
| QILQW               | P02668        | 93                | 97              | X                |                    |                   |
| ILQWQ               | P02668        | 94                | 98              | X                |                    |                   |
| QWQVLSNTVP          | P02668        | 96                | 105             | X                |                    |                   |
| TMARHPPHP           | P02668        | 115               | 123             | X                |                    |                   |
| RHPHPHLSF           | P02668        | 118               | 126             | X                |                    |                   |
| SPPEINT             | P02668        | 176               | 182             | X                |                    |                   |
| RPKHPIKHQ           | P02662        | 16                | 24              |                  | X                  |                   |
| GLPQEVLNENLLRF      | P02662        | 25                | 38              |                  | X                  |                   |
| PQEVLNENLLRFFV      | P02662        | 27                | 40              |                  | X                  |                   |
| FFVAPFPEVFGKEK      | P02662        | 38                | 51              |                  |                    |                   |

|                  |        |     |     |  |   |   |
|------------------|--------|-----|-----|--|---|---|
| SKDIG            | P02662 | 56  | 60  |  | X |   |
| KDIGS            | P02662 | 57  | 61  |  | X |   |
| IKQM             | P02662 | 72  | 75  |  | X |   |
| IQKEDVPSERYLGY   | P02662 | 96  | 109 |  | X |   |
| QKEDVPSERYLGYL   | P02662 | 97  | 110 |  | X |   |
| KYKVPQLEIVP      | P02662 | 118 | 128 |  | X |   |
| MKEGIHAQQKEPMIG  | P02662 | 138 | 152 |  | X |   |
| FYPELFRQFYQLD    | P02662 | 160 | 172 |  | X |   |
| TQYTDAPSFSDIPNPI | P02662 | 186 | 201 |  | X |   |
| ESIISQETYKQEKD   | P02663 | 27  | 40  |  | X |   |
| NANEEYSIG        | P02663 | 61  | 70  |  | X |   |
| VKITVDDKHYPKAL   | P02663 | 84  | 97  |  | X |   |
| QFYQKFPQYLQYL    | P02663 | 102 | 114 |  | X |   |
| QKFP             | P02663 | 105 | 108 |  | X |   |
| KFPQ             | P02663 | 106 | 109 |  | X |   |
| LYQGPIVLNPWDQV   | P02663 | 114 | 127 |  | X |   |
| QLSTSEENSKTVDM   | P02663 | 142 | 156 |  | X |   |
| TKKTKLTEEEKNRL   | P02663 | 163 | 176 |  | X |   |
| ISQRYQKFALPQY    | P02663 | 182 | 194 |  | X |   |
| SQRYQKFALPQYL    | P02663 | 183 | 195 |  | X |   |
| QSLVYPPGPIPNLSP  | P02666 | 71  | 86  |  | X |   |
| SLVYPPGPIPNLSPQ  | P02666 | 72  | 87  |  | X |   |
| NSLPQNIPPLTQTPVV | P02666 | 83  | 98  |  | X |   |
| VVVPFLQPEVMGVSK  | P02666 | 97  | 112 |  | X |   |
| VVPPFLQPEVMGVSKV | P02666 | 98  | 113 |  | X |   |
| APKHKEMPPKYPV    | P02666 | 118 | 131 |  | X |   |
| FTESQSLTLTDVENL  | P02666 | 134 | 148 |  | X |   |
| SQSLTLTDVENLHLP  | P02666 | 137 | 151 |  | X |   |
| VENLHLPPLL       | P02666 | 145 | 155 |  | X |   |
| SVLSLSQSKVLP     | P02666 | 176 | 187 |  | X |   |
| LYQEPVLGPVRGPFPI | P02666 | 207 | 221 |  | X |   |
| YQEPVLGPVRGPFPI  | P02666 | 208 | 222 |  | X |   |
| QEPVLGPVRGPFPIIV | P02666 | 209 | 224 |  | X |   |
| EQPIRCEKDERFF    | P02668 | 27  | 39  |  | X |   |
| RFFSDKIAKYIPIQ   | P02668 | 37  | 50  |  | X |   |
| IAKYIPIQYVL      | P02668 | 43  | 53  |  | X |   |
| KYIPIQYVLSRY     | P02668 | 45  | 56  |  | X |   |
| YYQQKPVALINNQF   | P02668 | 63  | 76  |  | X |   |
| LSFMAIPPKKNQDKT  | P02668 | 124 | 138 |  | X |   |
| GLPQEV           | P02662 | 25  | 31  |  |   | X |
| STEDQAMEDIKQM    | P02662 | 63  | 75  |  |   | X |
| EIVPNSV          | P02662 | 85  | 91  |  |   | X |
| IVPNSVE          | P02662 | 86  | 92  |  |   | X |
| PNSVEQKHQKE      | P02662 | 88  | 99  |  |   | X |
| QKHQKEDVPS       | P02662 | 93  | 103 |  |   | X |
| AEERLH           | P02662 | 131 | 136 |  |   | X |
| YYVPLGTQYT       | P02662 | 180 | 189 |  |   | X |

|               |        |     |     |  |  |   |
|---------------|--------|-----|-----|--|--|---|
| SDIPNPI       | P02662 | 195 | 201 |  |  | X |
| TYKQEKMAINP   | P02663 | 34  | 45  |  |  | X |
| SKENLCSTFCK   | P02663 | 46  | 56  |  |  | X |
| TVDDKHYQKA    | P02663 | 87  | 96  |  |  | X |
| QKALNEINQF    | P02663 | 94  | 103 |  |  | X |
| PITPTLN       | P02663 | 133 | 139 |  |  | X |
| SLPQNIPPLTQT  | P02666 | 84  | 95  |  |  | X |
| PLTQTPV       | P02666 | 91  | 97  |  |  | X |
| MPFPKYPVEP    | P02666 | 124 | 133 |  |  | X |
| PLPPTVM       | P02666 | 165 | 171 |  |  | X |
| KAVPYQQRDM    | P02666 | 191 | 200 |  |  | X |
| QAFLLY        | P02666 | 203 | 208 |  |  | X |
| AFLLYQ        | P02666 | 204 | 209 |  |  | X |
| YVLSRYPYSG    | P02668 | 51  | 60  |  |  | X |
| GLNYYQ        | P02668 | 60  | 65  |  |  | X |
| PAAVRSPAQILQW | P02668 | 85  | 97  |  |  | X |
